# Supplementary material for: Oleylamine as a reducing agent in syntheses of magic-size clusters and monodisperse quantum dots: optical and photoconductivity studies
Source: Royal Society of Chemistry journal article supplement (doi:10.1039/c6cp07052c), 2016-12-20
Supplement: c6cp07052c1.pdf [file c6cp07052c1.pdf]

**Electronic Supplementary Information (ESI)**

**Oleylamine as reducing agent in syntheses of magic-size clusters and monodisperse  
quantum dots: optical and photoconductivity studies**

R. S. Ningthoujam,<sup>a,b,\*</sup> Anurag Gautam<sup>b</sup> and N. Padma<sup>c</sup>

<sup>a</sup>Chemistry Division, Bhabha Atomic Research Centre, Mumbai-400085, India.

<sup>b</sup>Department of Chemistry, University of Victoria, Victoria, British Columbia V8W 3V6, Canada

<sup>c</sup>Technical Physics Division, Bhabha Atomic Research Centre, Mumbai-400085, India.

**\*To whom correspondence should be addressed.** E-mail: [rsn@barc.gov.in](mailto:rsn@barc.gov.in)

Table S1 Peak positions ( $\lambda_p$ , nm/eV) and their full widths at half maximum intensity (FWHM, nm/eV) of PbSe prepared using OAM at different injection temperatures ( $T_{inj}$ , °C) for different waiting times ( $W_t$ , min) after injection of TOP-Se. TEM particle sizes ( $D_{tem}$ , nm) along with estimated particle sizes ( $D_{est}$ , nm) based on equation (1) are given.

| $T_{inj}$<br>(°C) | $W_t$<br>(min) | $\lambda_p$ (nm)/(eV) |          | FWHM (nm)  |          | $D_{tem}$ (nm) | $D_{est}$ (nm) |
|-------------------|----------------|-----------------------|----------|------------|----------|----------------|----------------|
|                   |                | Absorption            | Emission | Absorption | Emission |                |                |
| 22                | 5              | 600/2.065             | 790      | 113        | 159      |                | 1.62           |
|                   | 1080           | 600/2.065             | 790      | 114        | 178      |                | 1.62           |
| 80                | 15             | 600/2.065             | 780      |            | 123      |                | 1.62           |
|                   | 30             | 600/2.065             | 780      | 111        | 106      |                | 1.62           |
|                   | 45             | 941/1.316             | 1024     |            | 152      |                | 2.83           |
|                   | 60             | 995/1.245             | 1078     | 125        | 149      |                | 3.02           |
|                   | 120            | 1180/1.050            | 1257     | 120        | 167      |                | 3.68           |
|                   | 180            | 1270/0.975            | 1360     | 120        | 170      |                | 4.01           |
| 100               | 0.5            | 600/2.065             | 780      | 104        | 125      |                | 1.62           |
|                   | 2              | 600/2.065             | 780      | 108        | 145      |                | 1.62           |
|                   | 5              | 600/2.065             | 780      | 109        | 141      |                | 1.62           |
|                   | 10             | 1046/1.184            | 1127     | 106        | 149      |                | 3.21           |
|                   | 15             | 1138/1.088            | 1215     | 112        | 155      |                | 3.53           |
|                   | 30             | 1252/0.989            | 1363     | 116        | 159      |                | 3.94           |
|                   | 60             | 1350/0.917            | 1481     | 114        | 158      |                | 4.28           |
| 120               | 0.5            | 620/1.998             | 800      | 121        | 144      |                | 1.69           |
|                   | 3              | 671/1.846             | 1111     | 128        | 158      |                | 1.87           |
|                   | 5              | 1225/1.011            | 1300     | 115        | 159      |                | 3.84           |
|                   | 10             | 1370/0.904            | 1486     | 108        | 151      |                | 4.36           |
|                   | 15             | 1411/0.878            | 1570     | 119        |          |                | 4.51           |
|                   | 30             | 1450/0.854            |          | 127        |          |                | 4.64           |
|                   | 60             | 1483/0.835            |          | 130        |          |                | 4.76           |
| 140               | 0.5            | 600/2.065             | 812      | 100        | 175      | < 2            | 1.62           |
|                   | 2              | 1240/1.069            | 1308     | 107        | 142      | 4.1            | 3.61           |
|                   | 5              | 1460/0.854            | 1536     | 100        | 129      | 5.1            | 4.64           |
|                   | 10             | 1497/0.794            | 1598     | 101        |          | 5.4            | 5.03           |
|                   | 30             | 1527/0.777            |          | 119        |          | 6.3            | 5.15           |
| 160               | 0.5            | 1238/1.001            | 1304     | 106        | 145      |                | 3.89           |
|                   | 2              | 1415/0.875            | 1587     | 104        |          |                | 4.52           |
|                   | 5              | 1479/0.837            |          | 115        |          |                | 4.74           |
|                   | 10             | 1560/0.794            |          | 112        |          |                | 5.03           |
|                   | 15             | 1611/0.769            |          | 119        |          |                | 5.21           |
|                   | 60             |                       |          |            |          |                |                |
| 180               | 0.5            | 1676/0.739            |          | 108        |          |                | 5.44           |
|                   | 5              | 1782/0.695            |          | 116        |          |                | 5.82           |
|                   | 10             | 1962/0.631            |          | 117        |          |                | 6.46           |
|                   | 15             | 2118/0.585            |          | 105        |          |                | 7.01           |
|                   | 60             | 2394/0.517            |          |            |          |                | 8.01           |

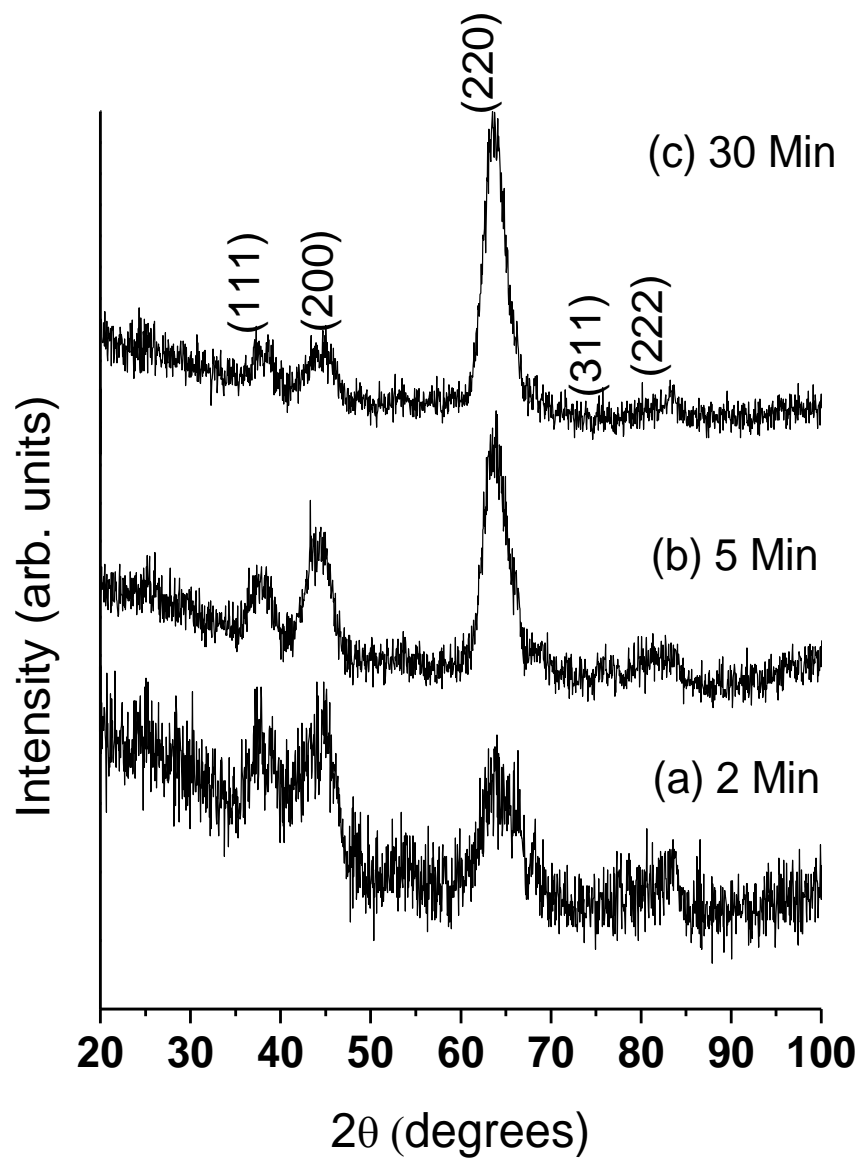

Figure S1. The XRD patterns of PbSe particles prepared using OAM at 140 °C with duration of 2, 5 and 30 min. Samples are prepared with OAM.

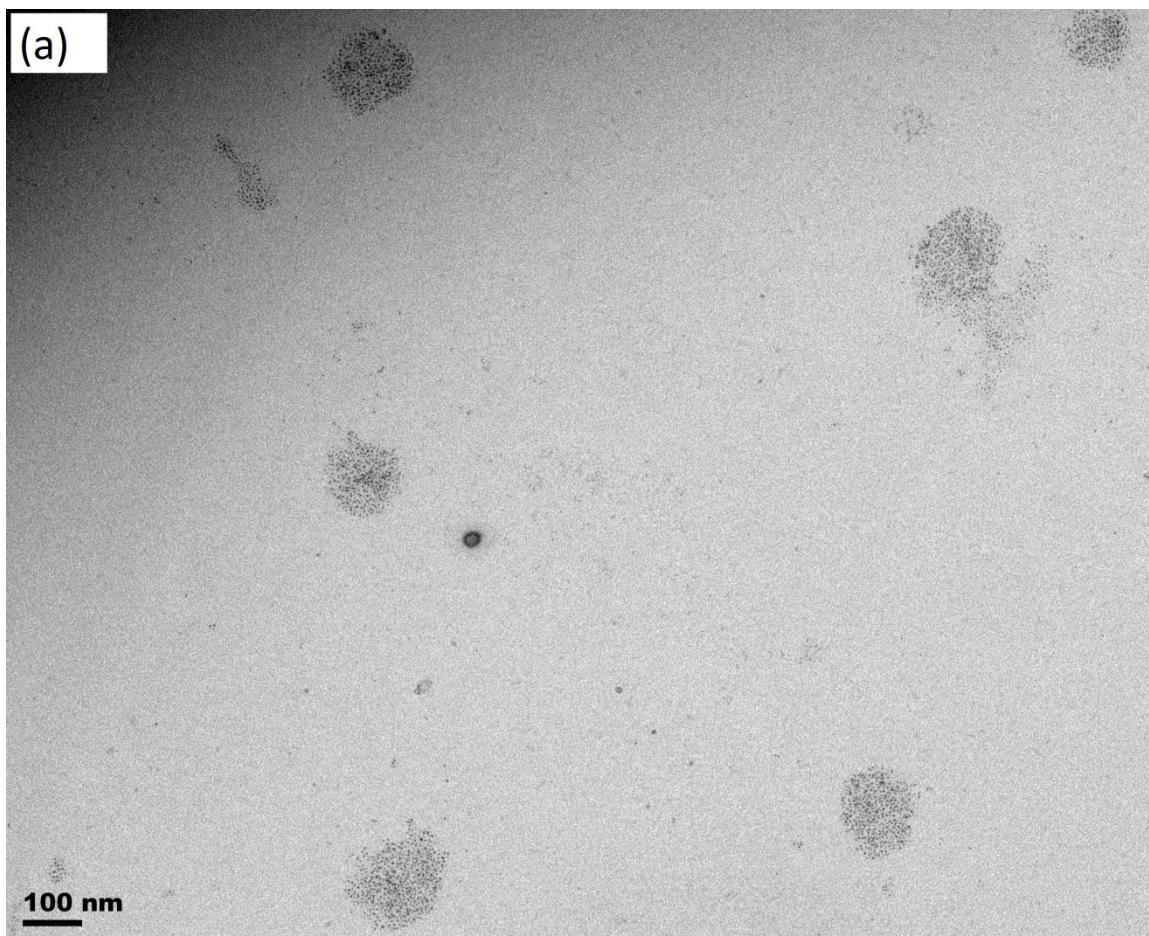

Figure S2 The lower magnified TEM image of sample prepared using OAM at 140 °C for waiting time (0.5 min).

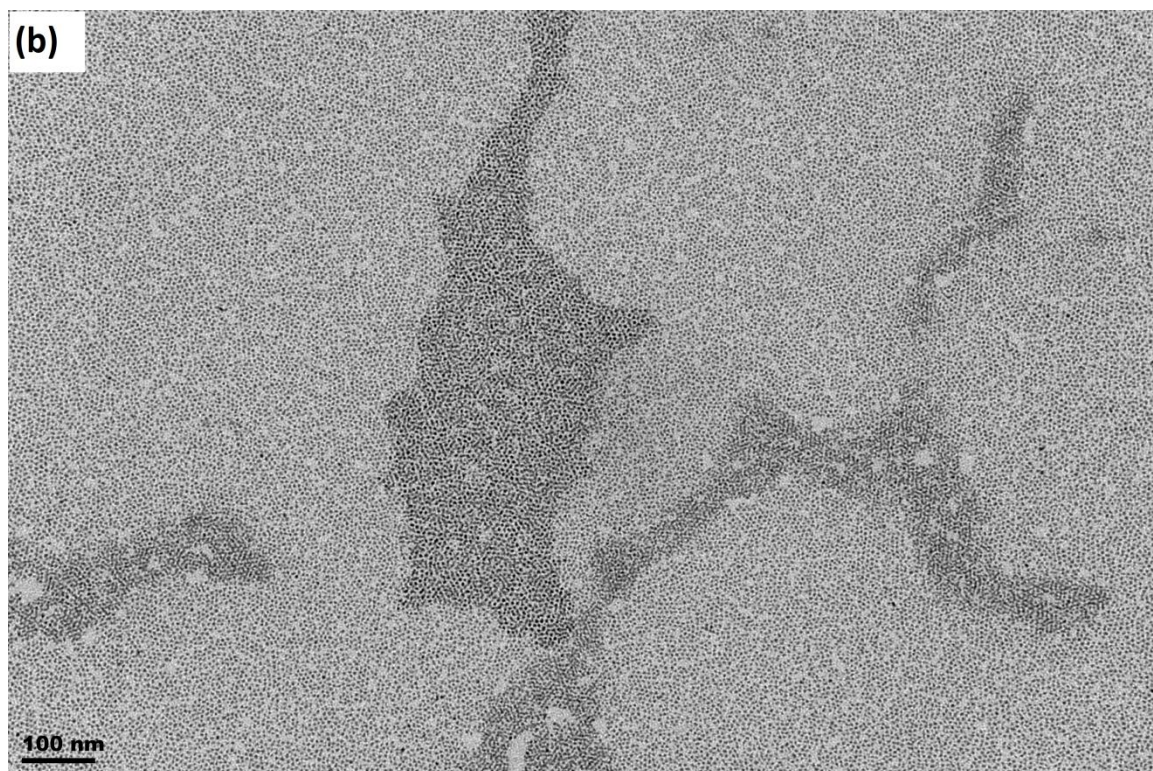

Figure S3 The lower magnified TEM image of sample prepared using OAM at 140 °C for waiting time (2 min).



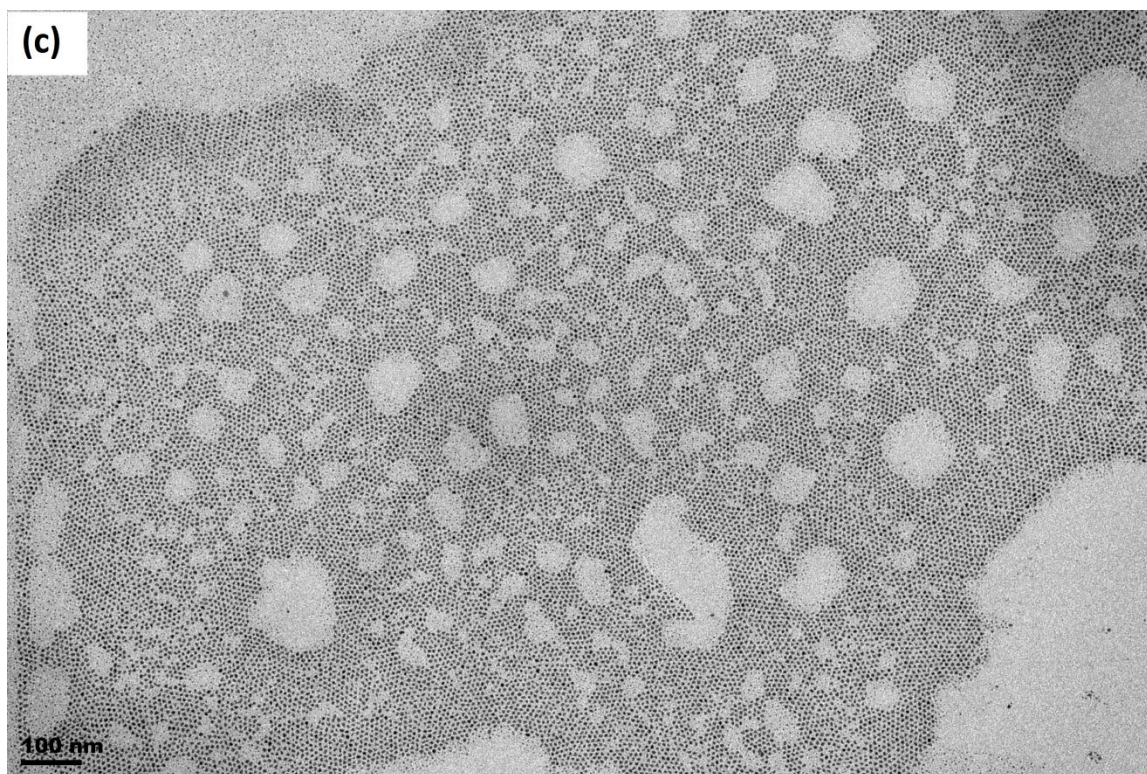

Figure S4 The lower magnified TEM image of sample prepared using OAM at 140 °C for waiting time (5 min).

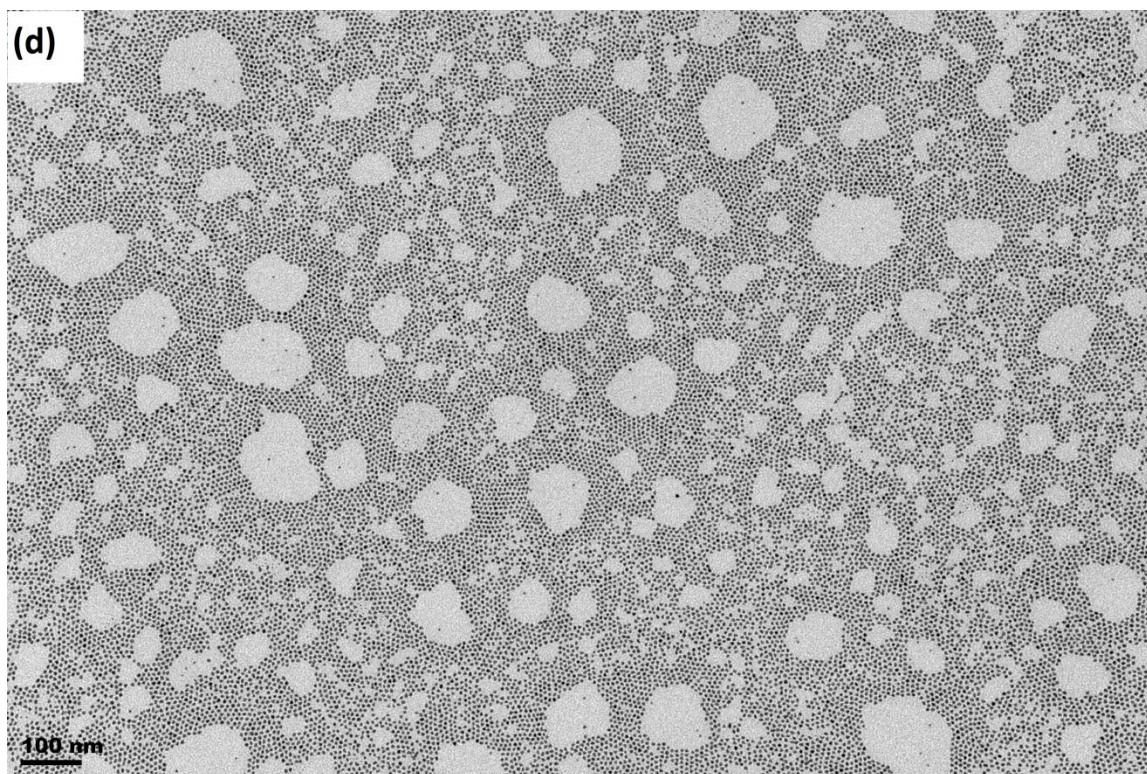

Figure S5 The lower magnified TEM image of sample prepared using OAM at 140 °C for waiting time (10 min).



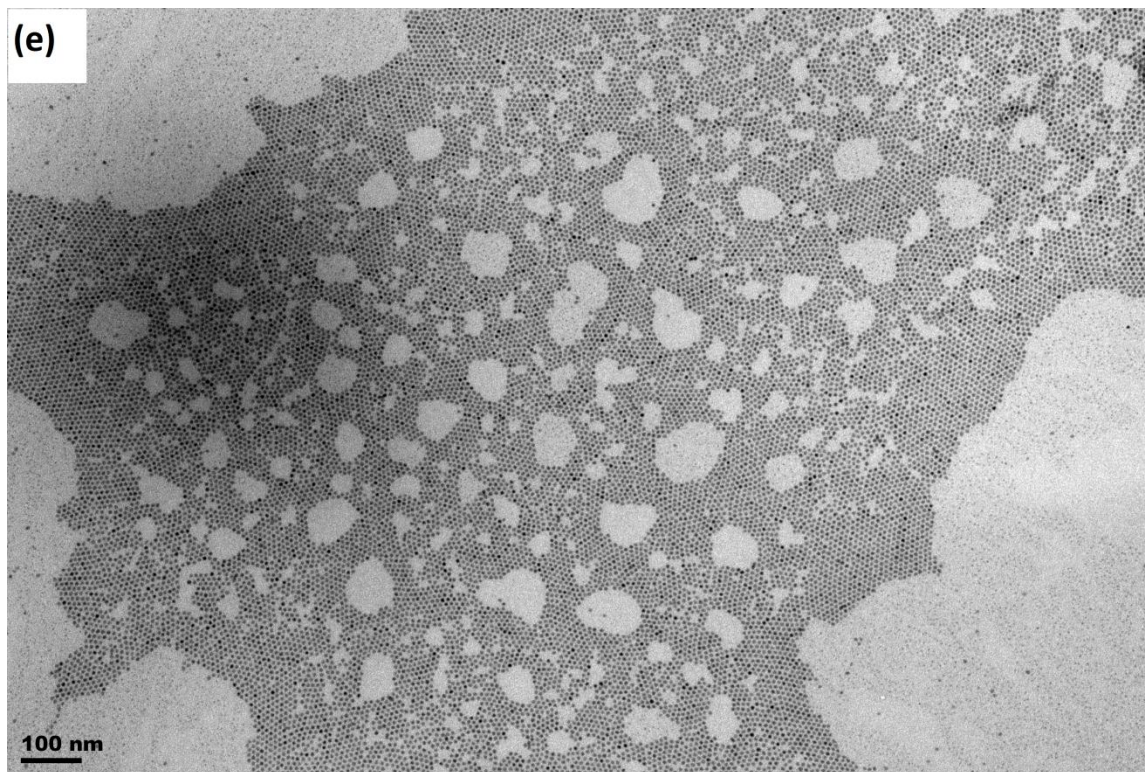

Figure S6 The lower magnified TEM image of sample prepared using OAM at 140 °C for waiting time (30 min).



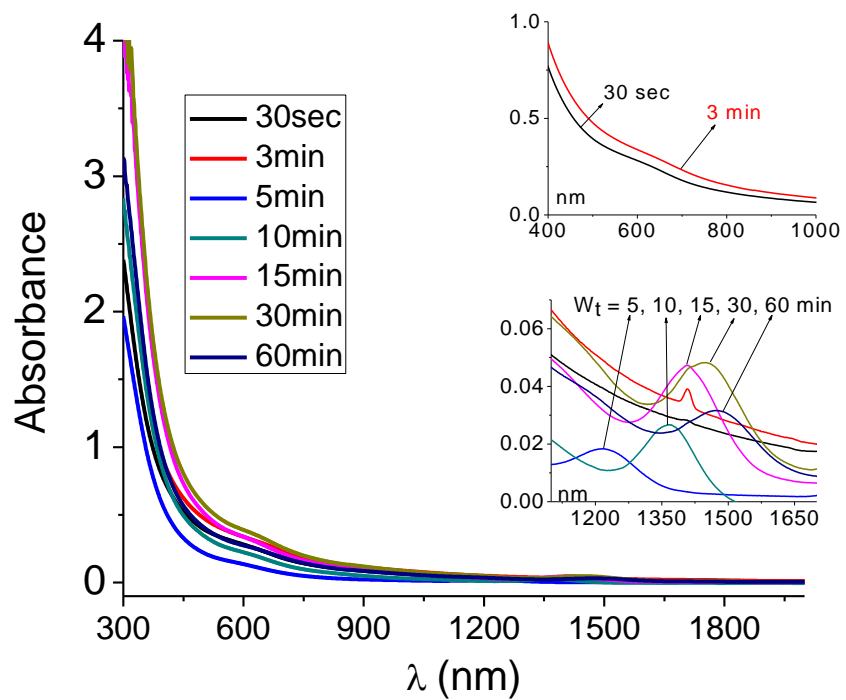

Figure S7 The UV-Visible-NIR spectra of sample prepared using OAM at 120 °C for different waiting times (0.5, 3, 5, 10, 15, 30 and 60 min).

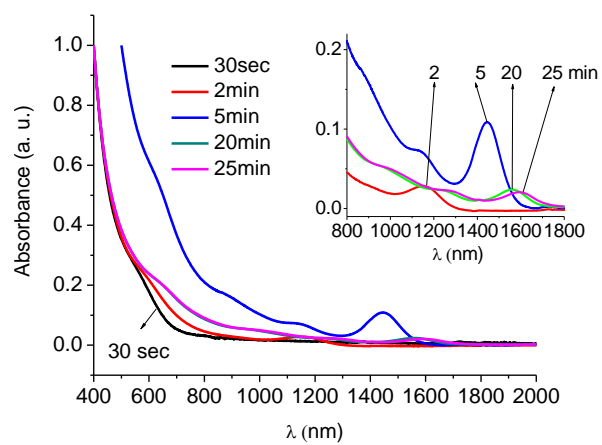

Figure S8 The UV-Visible-NIR spectra of sample prepared using OAM at 140 °C for different waiting times (0.5, 2, 5, 20 and 25 min).

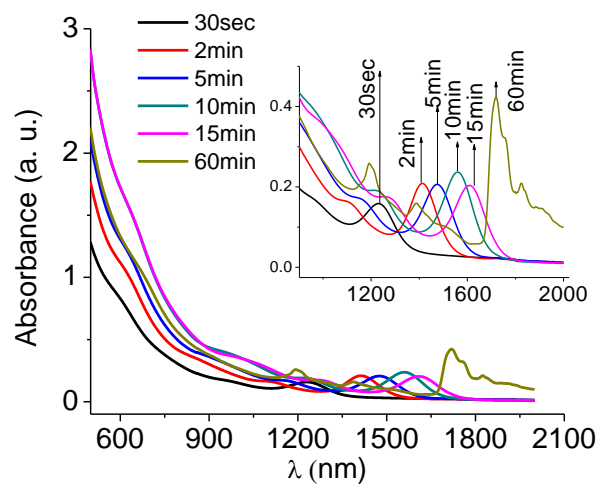

Figure S9 The UV-Visible-NIR spectra of sample prepared using OAM at 160 °C for different waiting times (0.5, 2, 5, 10, 15 and 60 min).



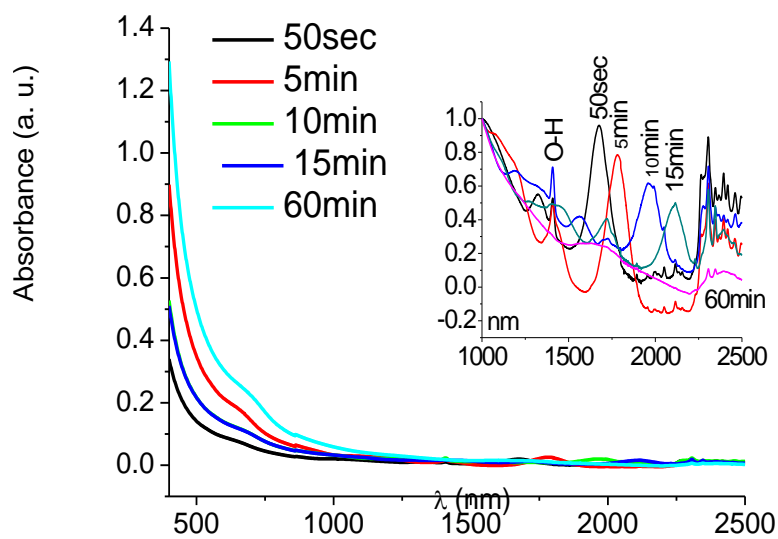

Figure S10 The UV-Visible-NIR spectra of sample prepared using OAM at 180 °C for different waiting times (0.5, 5, 10, 15 and 60 min).

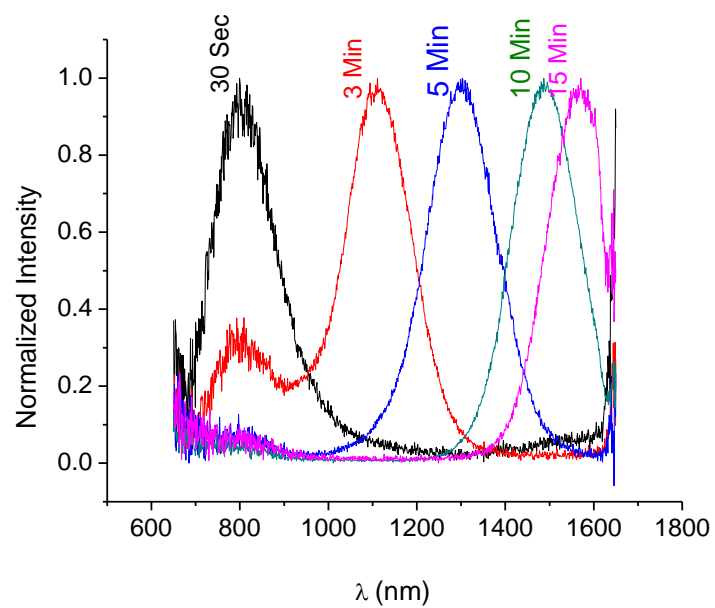

Figure S11 The PL spectra of sample prepared using OAM at 120 °C for different waiting times (0.5, 3, 5, 10, 15, 30 and 60 min).

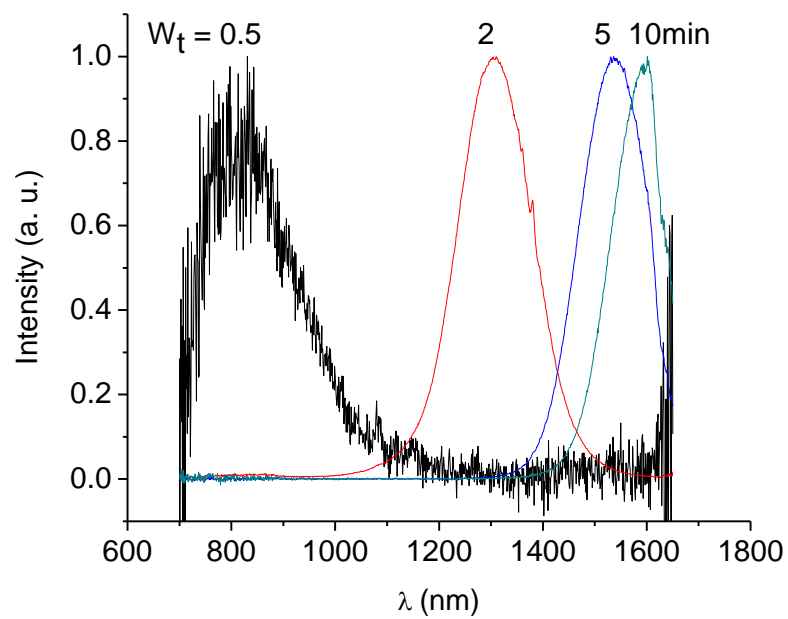

Figure S12 The PL spectra of sample prepared using OAM at 140 °C for different waiting times (0.5, 2, 5 and 10 min).



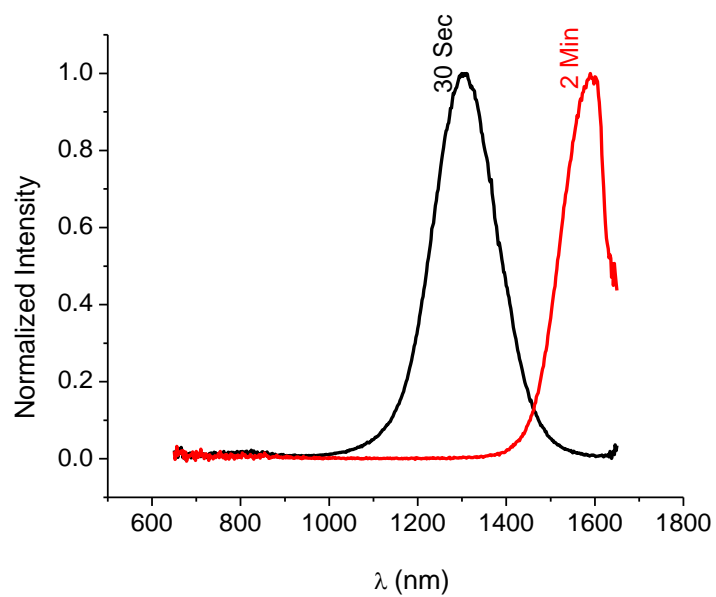

Figure S13 The PL spectra of sample prepared using OAM at 160 °C for different waiting times (0.5 and 2 min).

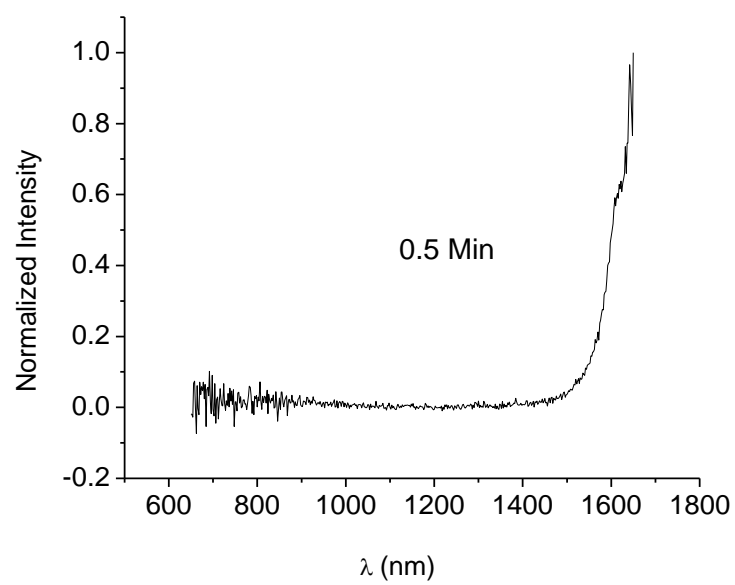

Figure S14 The PL spectra of sample prepared using OAM at 180 °C for waiting time (0.5 min).

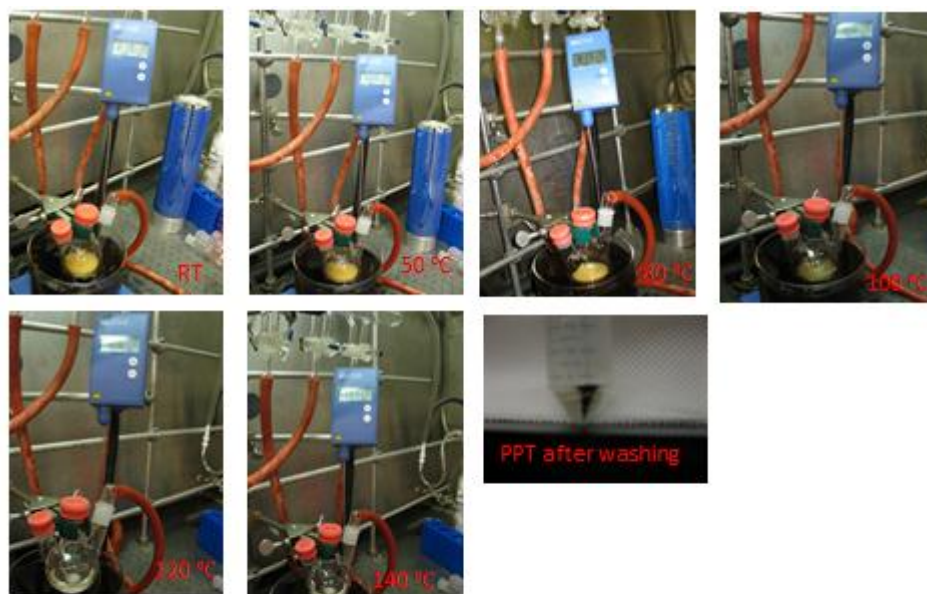

Figure S15 Pictures of intermediate heat-treatments (22-140 °C) for dissolving PbO in Oleic acid and 1-Octadecene in the three necked round bottom flask under vacuum and precipitate (ppt) obtained after centrifugation at 5000 RPM and followed by washing with 100% ethanol.



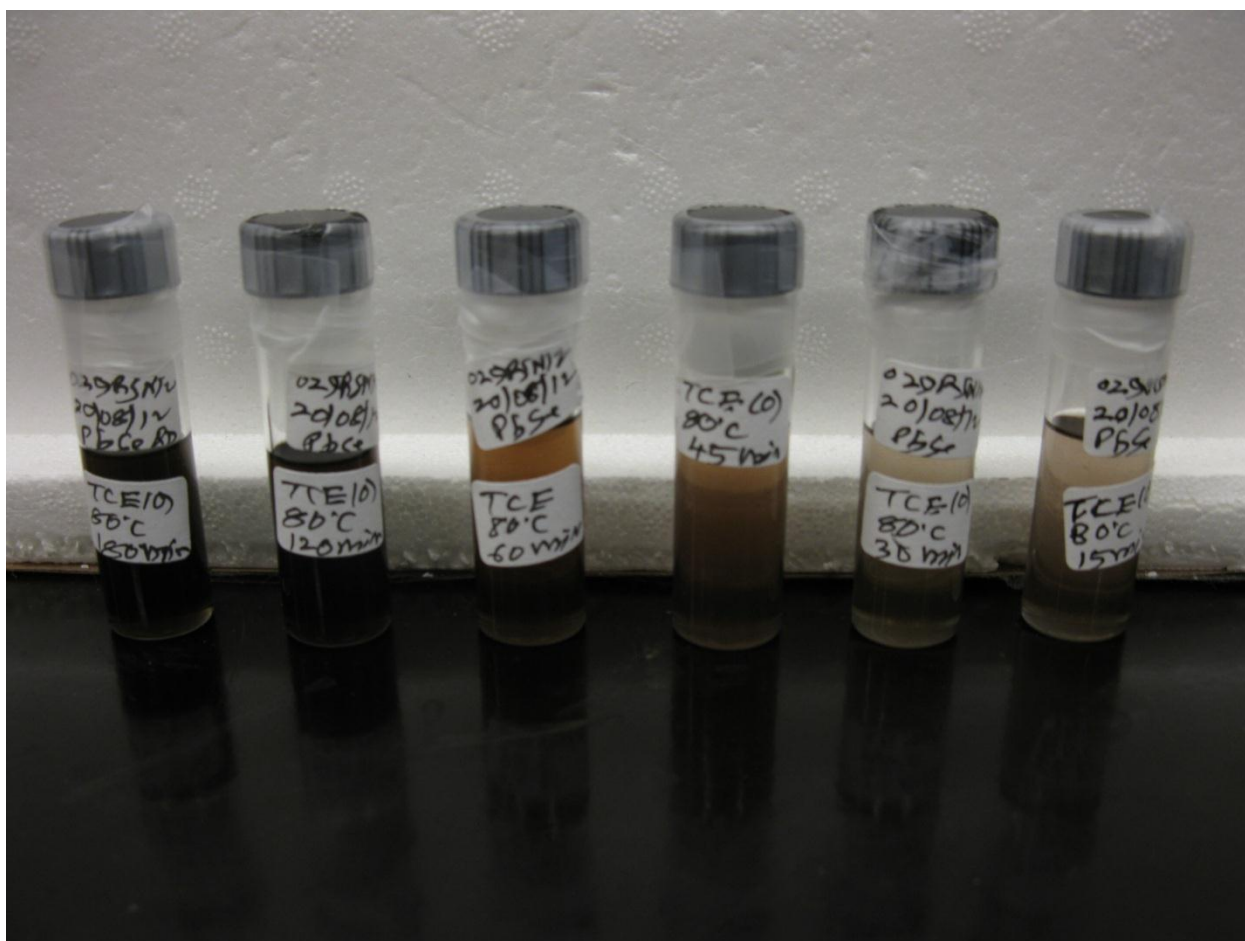

Figure S16 Pictures of the samples prepared using OAM at 80 °C for different waiting/delay times ( $W_t = 15, 30, 45, 60, 120$  and  $180$  nm).

## Section SA. Comparison XRD crystallite size, TEM particle size, Absorption and Emission bands of PbSe QDs prepared at 120 °C with waiting time of 5 minutes with and without OAM

A. XRD and TEM data

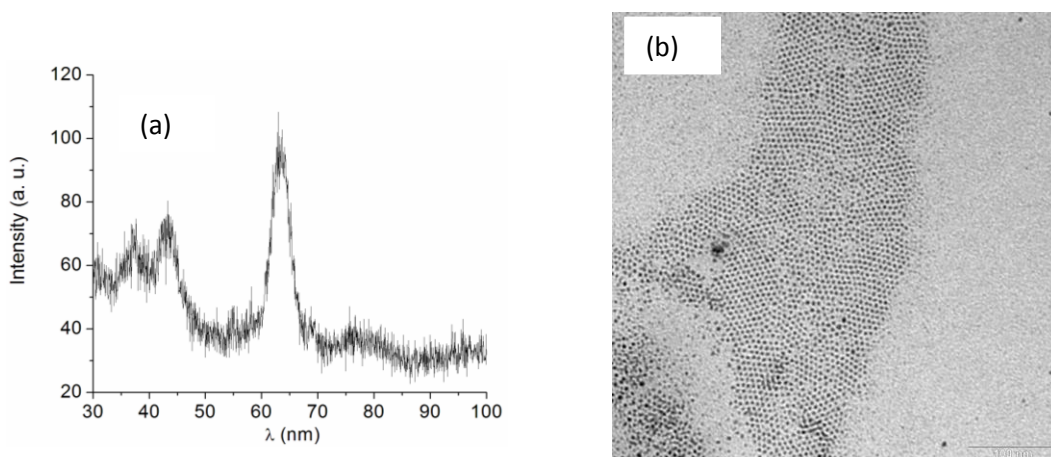

Figure S17. (a) The XRD patterns of PbSe QDs particles prepared at 120 °C with duration 5 min. Sample is prepared without OAM. Crystallite size is found to be 3.0 nm.

Sample prepared with OAM under same conditions of injection temperature and waiting time gives the crystallite size of ~ 3.2 nm.

(b) The TEM images of PbSe QDs particles prepared at 120 °C with duration 5 min. Sample is prepared without OAM. Particle size is found to be 3.8 nm.

Sample prepared with OAM under same conditions of injection temperature and waiting time gives the particle size of 4.0 nm.

## B. Absorption and Emission data

Without OAM, sample shows the absorption band at 1277 nm

With OAM, sample shows the absorption band at 1225 nm.

Difference in the lowest energy bands = 52 nm

Without OAM, sample shows the emission band at 1300 nm

With OAM, sample shows the emission band at 1330 nm.

Difference in the lowest energy bands = 0 nm

It is concluded that difference in absorption or emission bands of QDs prepared under same conditions (injection temperature and waiting time) with and without OAM is  $\pm 50$  nm.
